# Supplementary material
Source: MDPI journal article supplement (https://www.mdpi.com/2571-8789/3/1/6)
Supplement: s1 [file s1]

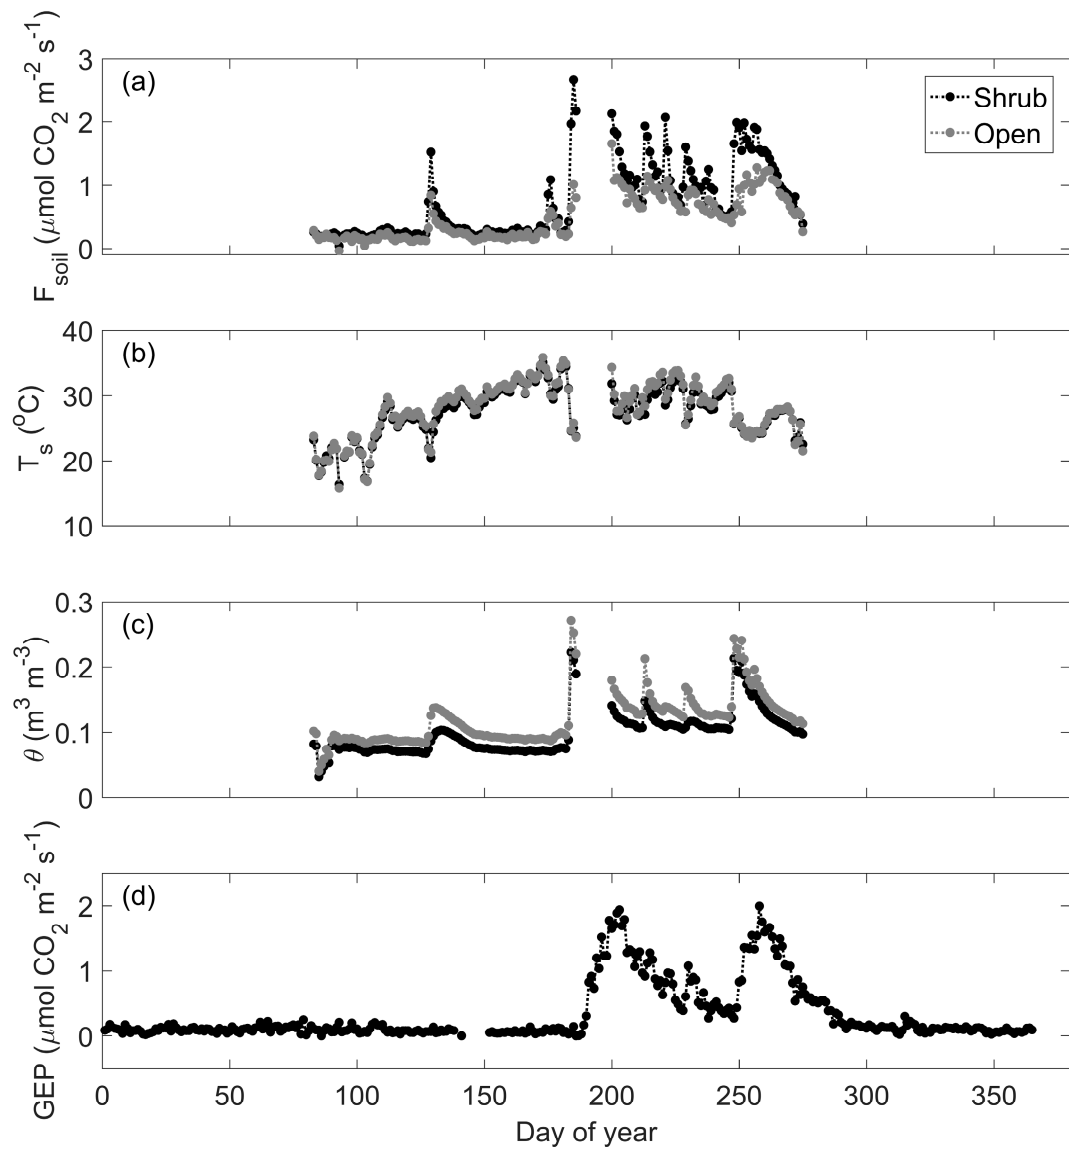

**Figure S1.** 2012 time series of observed daily mean soil CO<sub>2</sub> efflux ( $F_{\text{soil}}$ ), soil temperature ( $T_s$ ), and volumetric soil moisture ( $\theta$ ) for soil near patches of shrub (black) and in intercanopy space (gray) from the shrubland. Also shown is gross ecosystem photosynthesis (GEP).

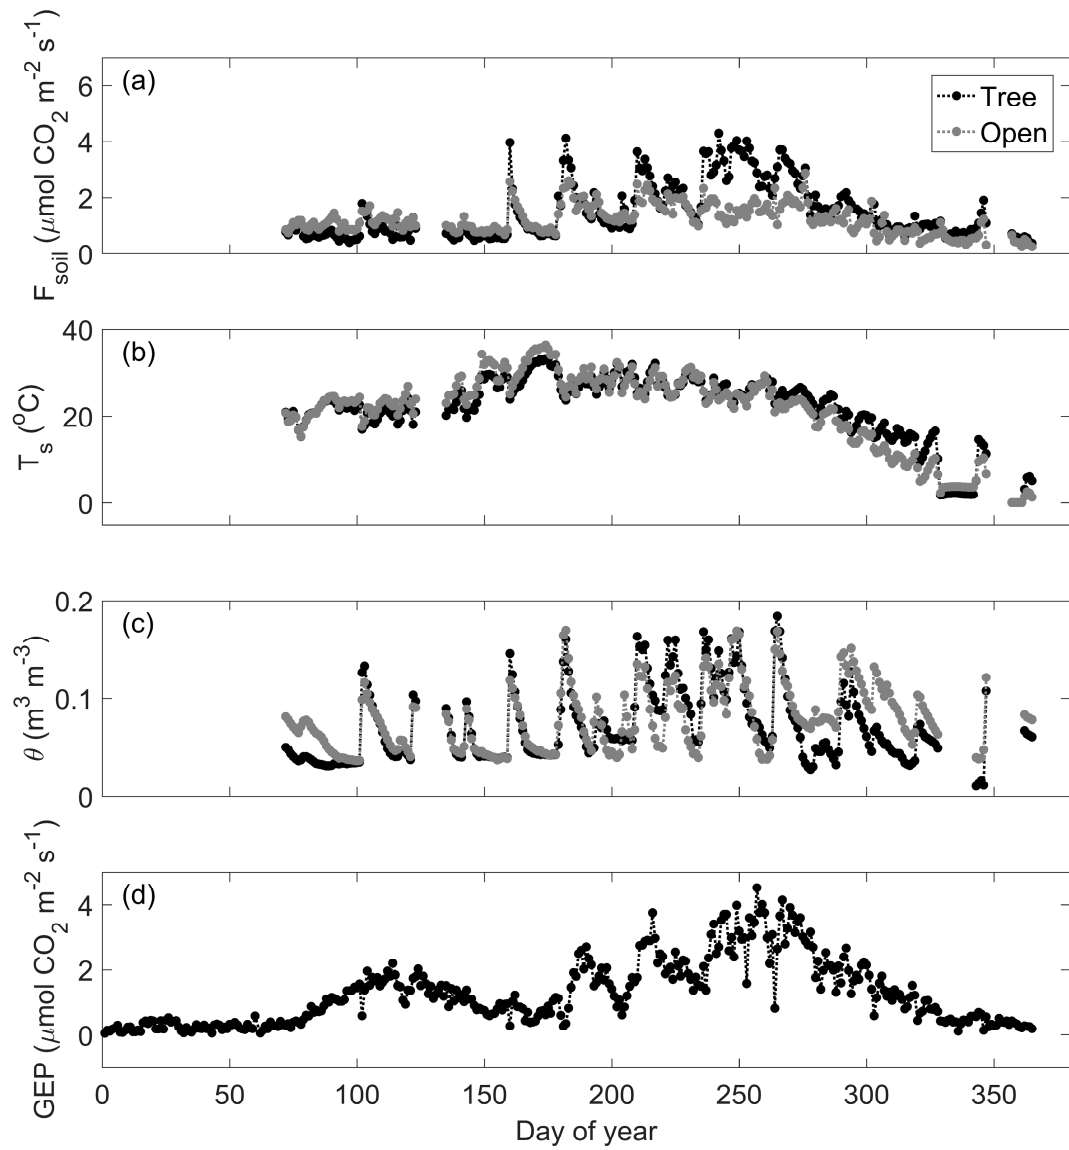

**Figure S2.** 2015 time series of observed daily mean soil CO<sub>2</sub> efflux ( $F_{\text{soil}}$ ), soil temperature ( $T_s$ ), and volumetric soil moisture ( $\theta$ ) for soil near mesquite trees (black) and in intercanopy space (gray) from the savanna. Also shown is gross ecosystem photosynthesis (GEP).

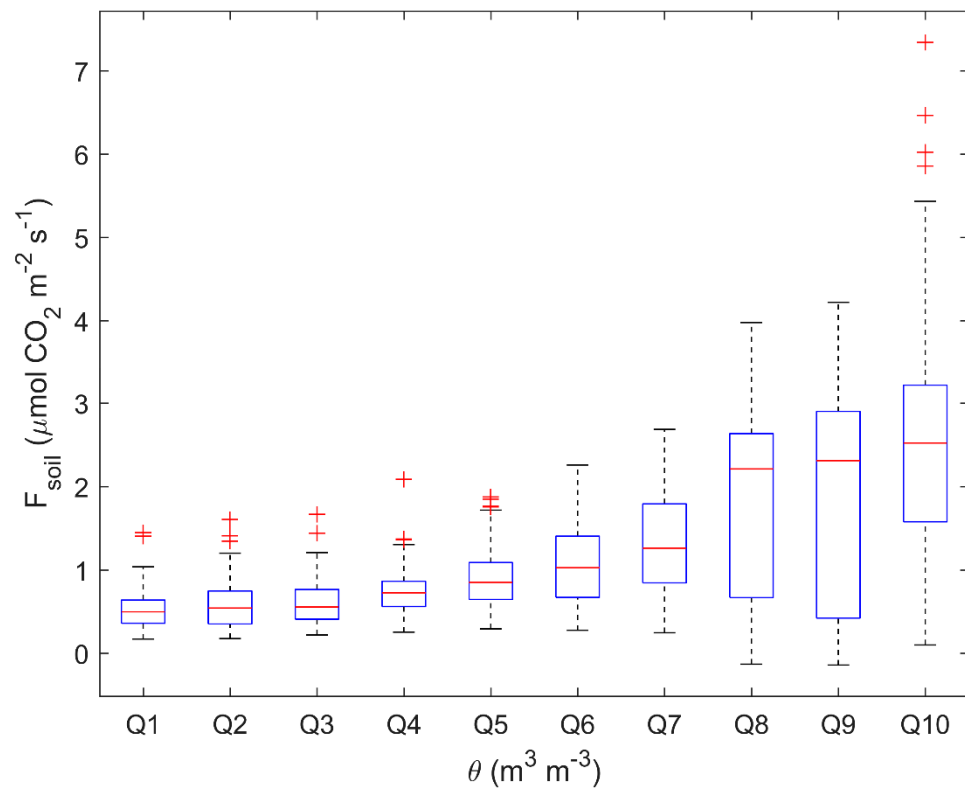

**Figure S3.** Boxplot of soil CO<sub>2</sub> efflux ( $F_{\text{soil}}$ ) for 10 quantiles of volumetric soil moisture ( $\theta$ ) at the grassland site.

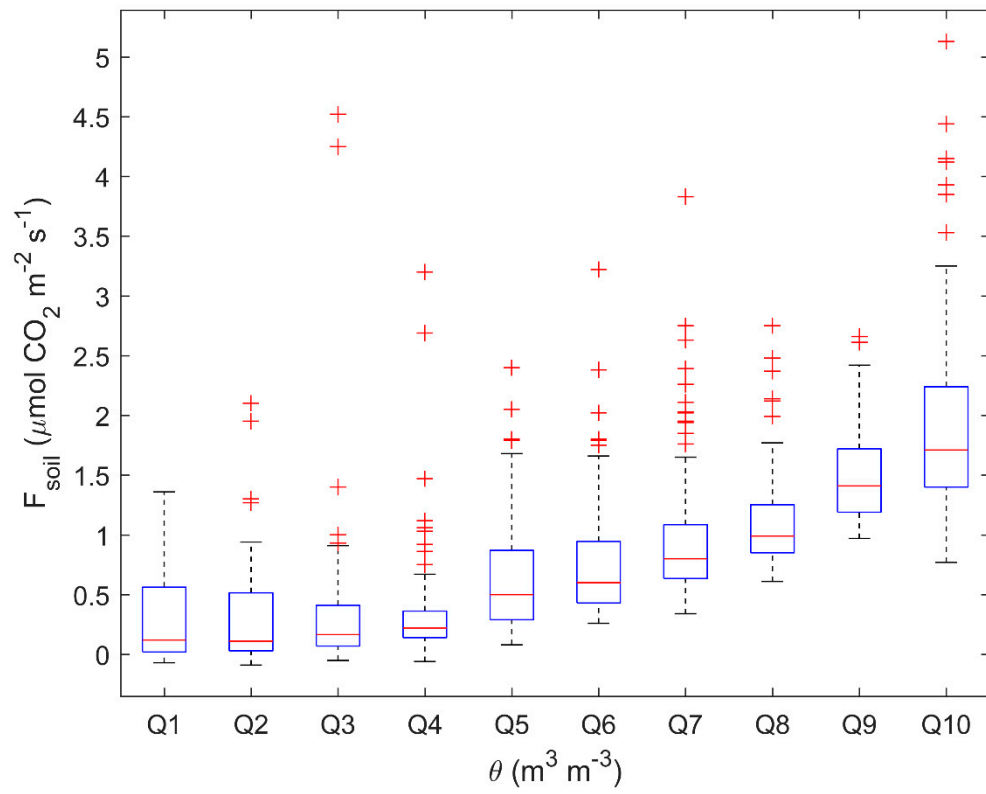

**Figure S4.** Boxplot of soil CO<sub>2</sub> efflux ( $F_{\text{soil}}$ ) for 10 quantiles of volumetric soil moisture ( $\theta$ ) at the shrubland site.

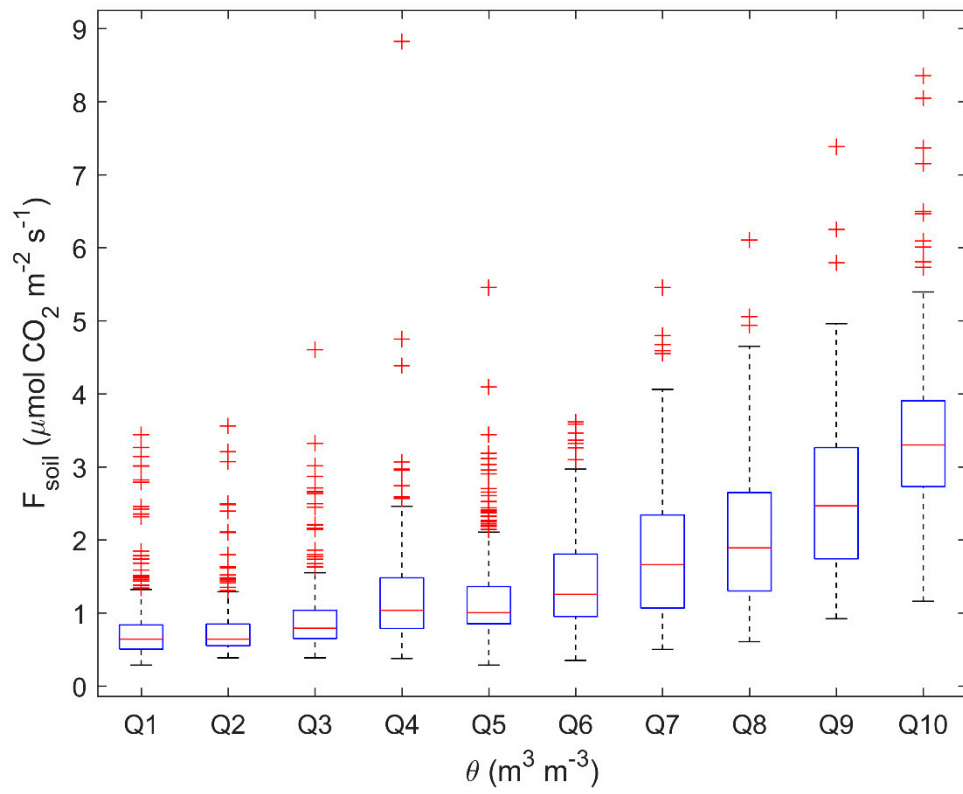

**Figure S5.** Boxplot of soil CO<sub>2</sub> efflux ( $F_{\text{soil}}$ ) for 10 quantiles of volumetric soil moisture ( $\theta$ ) at the savanna site.

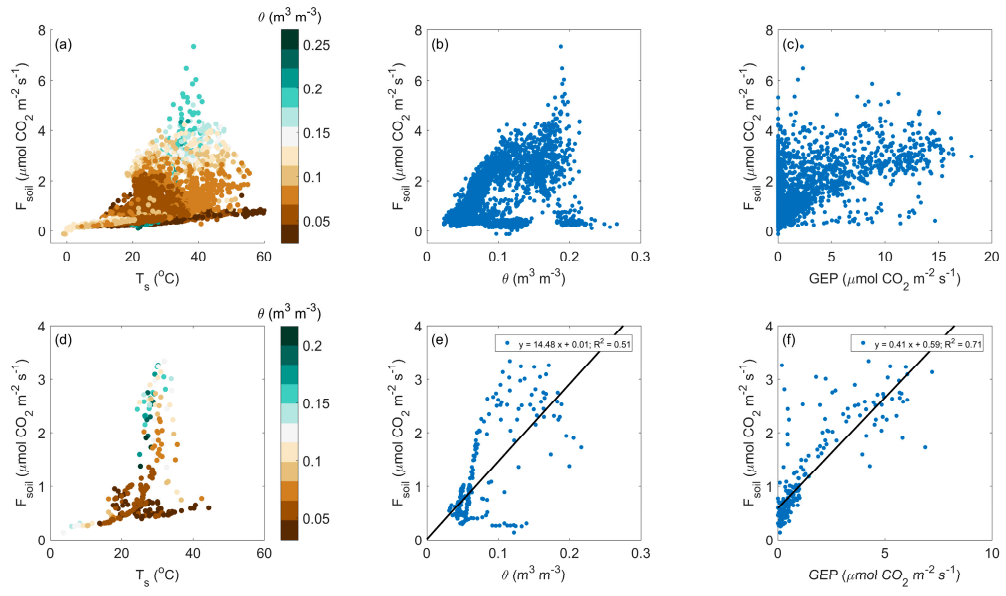

**Figure S6.** Controls on soil CO<sub>2</sub> efflux ( $F_{soil}$ ) at the grassland site.

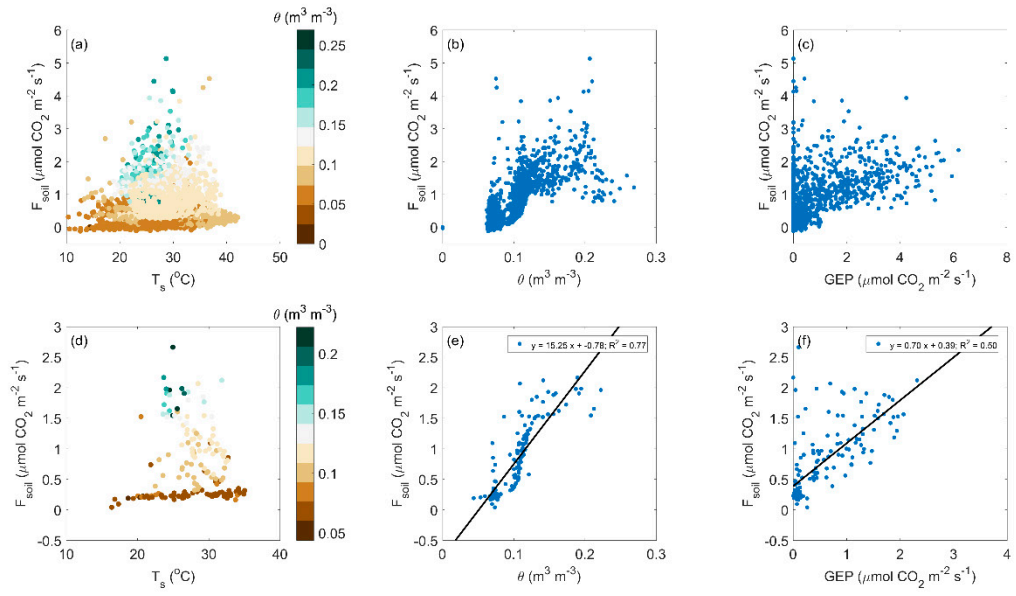

**Figure S7.** Controls on soil CO<sub>2</sub> efflux ( $F_{soil}$ ) at the shrubland site.

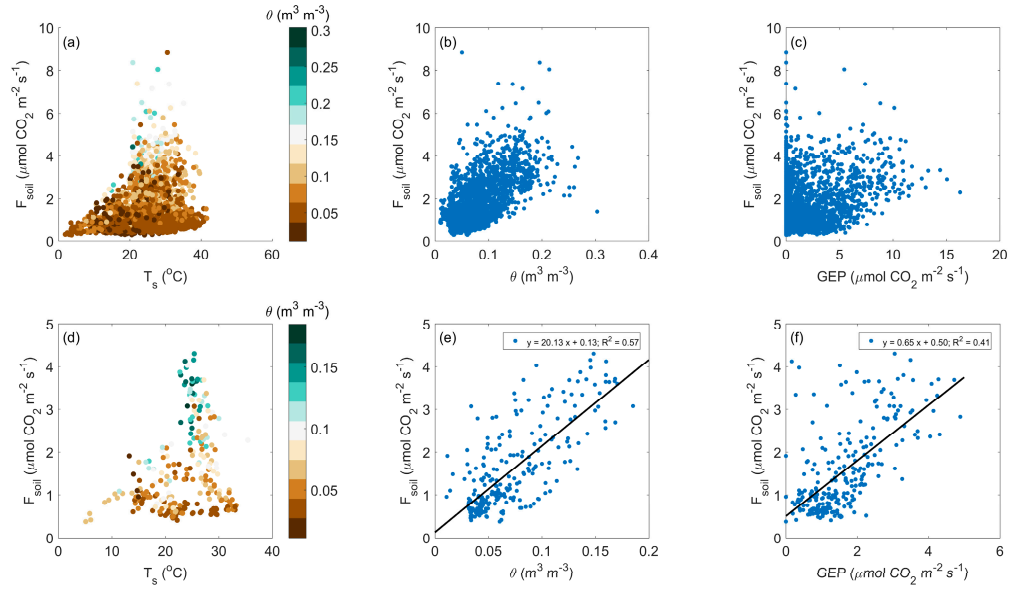

**Figure S8.** Controls on soil CO<sub>2</sub> efflux ( $F_{soil}$ ) at the savanna site.



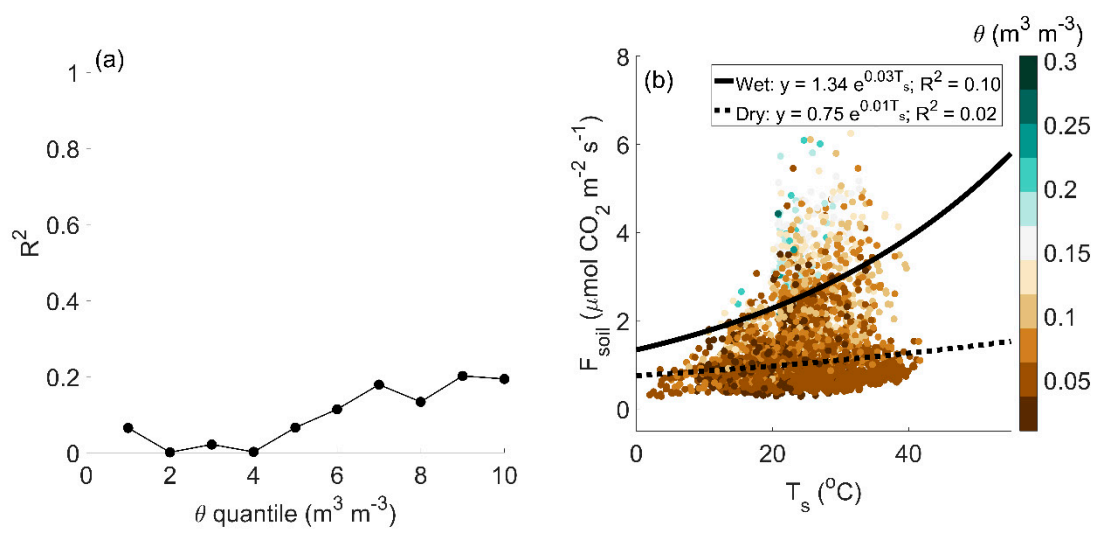

**Figure S9.** Same as Figure 3 but for the savanna site.

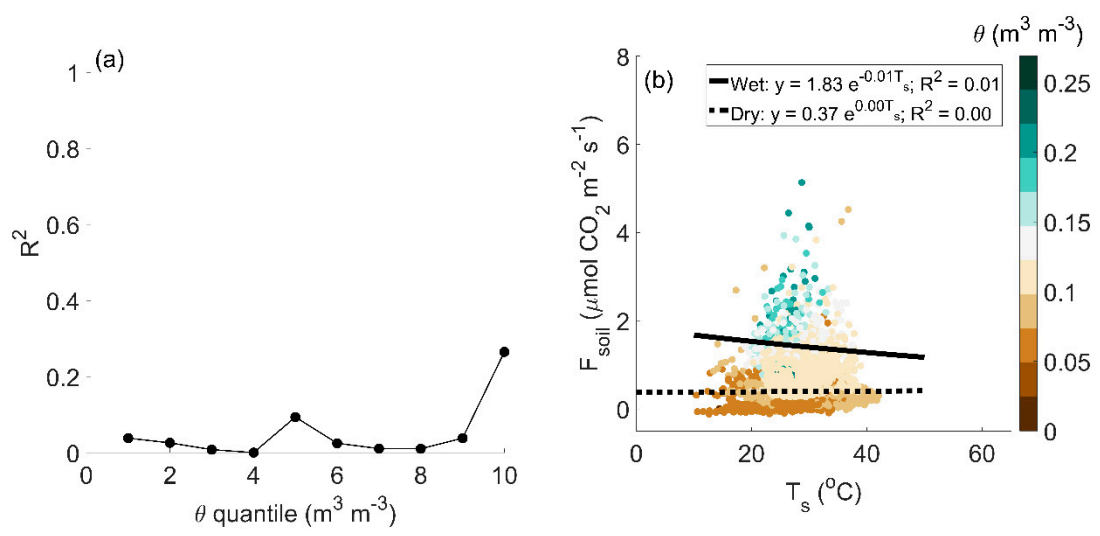

**Figure S10.** Same as Figure 3 but for the shrubland site.

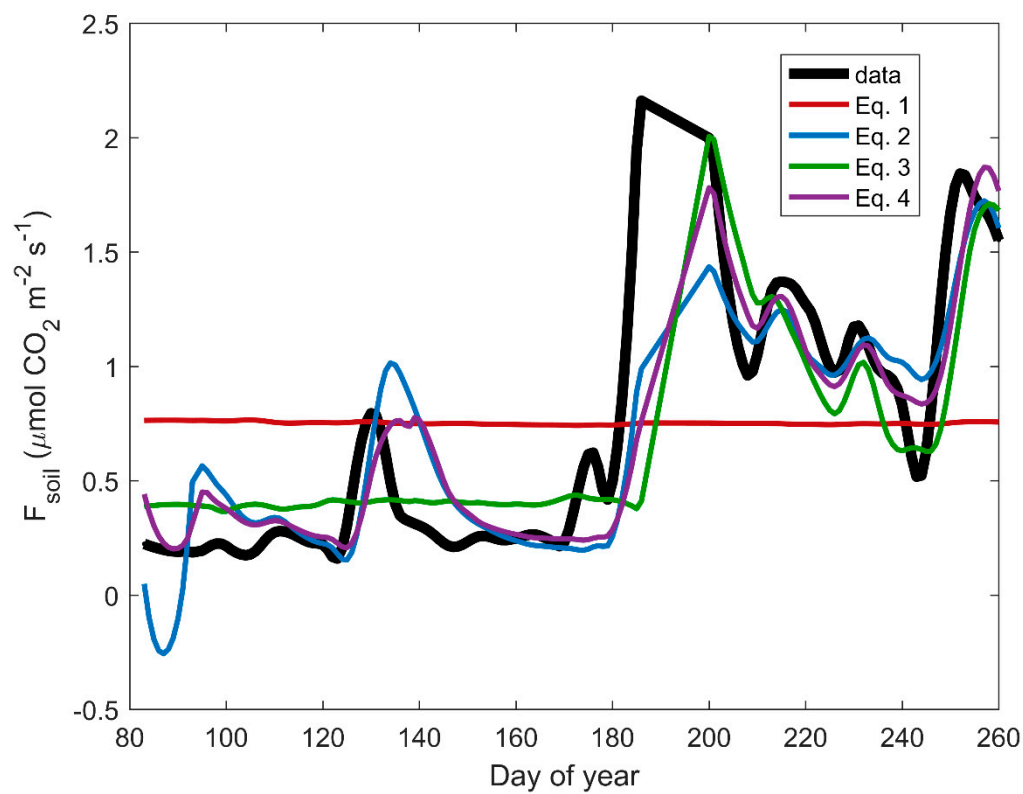

**Figure S11.** Same as Figure 6 but for the shrubland site.

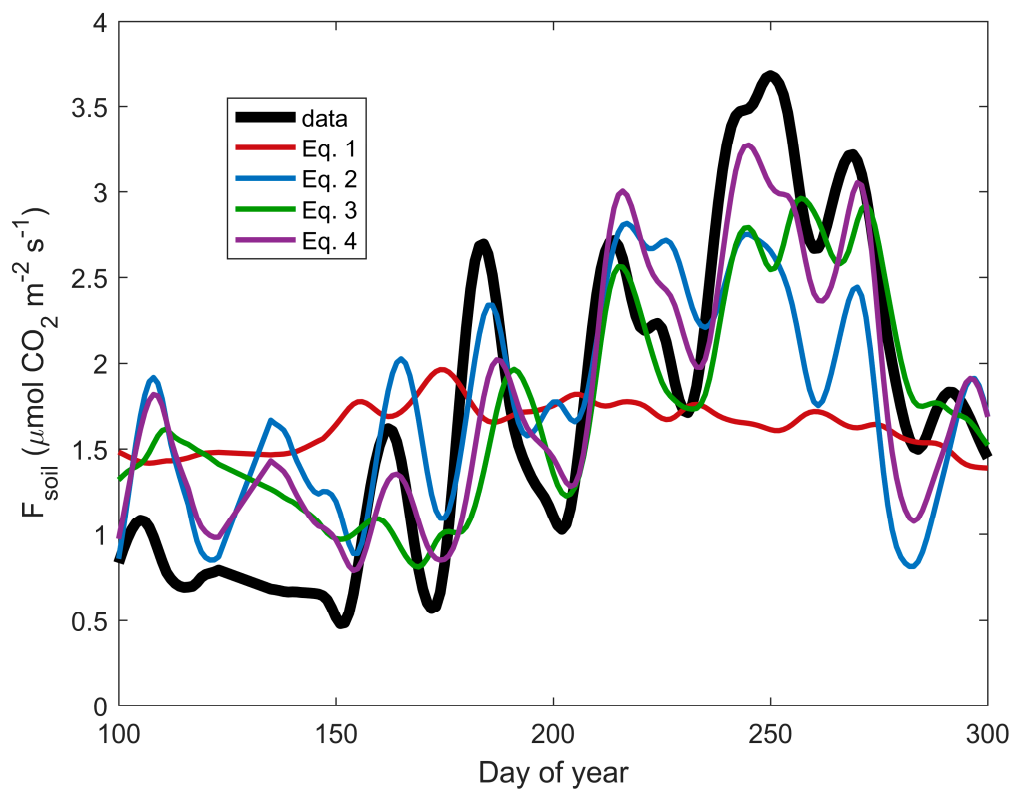

**Figure S12.** Same as Figure 6 but for the savanna site.
